# Supplementary material
Source: PubMed Central journal article supplement (PMC7459566)
Supplement: JVI.00959-20-s0001.pdf [file JVI.00959-20-s0001.pdf]

**Table 2. Primers used for modifying pT7/NSP1 and pT7/NSP3 vectors.**

| <b>Primer</b>      | <b>Sequence</b>                                                 |
|--------------------|-----------------------------------------------------------------|
| <b>NSP1-RfUF</b>   | AATTATGTCACTATCTAATTATACAGTATTTAGCCATCACAAG                     |
| <b>NSP1-RfUR</b>   | AATTATGTCACTATCTAATTATACAGTATTTAGCCATCACAAG                     |
| <b>RfUF</b>        | GAAGATGACAATGAGTCGAAATTTCAAATTGATAAAAATTTAATTT<br>CCGGAGATATCGA |
| <b>RfUR</b>        | GATAGTGACATAATTTCAATCTGTGGCCCTTCTGTAGC                          |
| <b>NSP3-RonF</b>   | CCATTTTGATACATGTTGAACAATCAAATACAGTGT                            |
| <b>NSP3-RonR</b>   | TTCGCAACCAAATGAATATTGATAATTACATCTCTGTATTAAT                     |
| <b>RonF</b>        | ATTCATTTGGTTGCGAAGGCGCCGGCGCAACGAACT                            |
| <b>RonR</b>        | CATGTATCAAAATGGTCATTCTGTGGCCCTTCTGTAGCT                         |
| <b>NSP3-FPF</b>    | CCATTTTGATACATGTTGAACAATCAAATACAGTGT                            |
| <b>NSP3-FPR</b>    | GCTAGCCTTGTCATCGTCATCCT                                         |
| <b>mRubyF</b>      | GATGACAAGGCTAGCGTGTCTAAGGGCGAAGAGCTGA                           |
| <b>mRubyR</b>      | CATGTATCAAAATGGTACTTGTACAGCTCGTCCATGCC                          |
| <b>mKateF</b>      | GATGACAAGGCTAGCGTGTCTAAGGGCGAAGAGC                              |
| <b>mKateR</b>      | CATGTATCAAAATGGTCAATTAAGTTTGTGCCCCAGTTTGC                       |
| <b>BFPF</b>        | GATGACAAGGCTAGCGTGAGCGAGCTGATTAAGGAGAACA                        |
| <b>BFPR</b>        | CATGTATCAAAATGGTAAATTAAGCTTGTGCCCCAGTTTGC                       |
| <b>NSP3-DbRubF</b> | CGGATCCGGAGCCACG                                                |
| <b>NSP3-DbRubR</b> | TTCGCAACCAAATGAATATTGATAATTACATCTCTGT                           |
| <b>DbRubF</b>      | CAATATTCATTTGGTTGCGAAGACTACAAAGACCATGAC                         |
| <b>DbRubR</b>      | TCGTGGCTCCGGATCCGTTGTACAGCTCGTCCATGCCACC                        |
| <b>mtR2AF</b>      | TATCGAATTAATTCCTGGAGGAGACTACAAAGACCATGAC                        |
| <b>mtR2AR</b>      | GTCATGGTCTTTGTAGTCTCCTCCAGGATTAATTCGATA                         |

**Table 1. Protein products of recombinant rSA11 strains.**

| Virus                    | Genome segment 5 |                 |                 |                 |                  |
|--------------------------|------------------|-----------------|-----------------|-----------------|------------------|
|                          | RNA size (bp)    | Protein Product |                 |                 |                  |
|                          |                  | uncleaved (aa)  | 2A cleaved (aa) | uncleaved (kDa) | 2A cleaved (kDa) |
| rSA11-wt                 | 1610             | 496             | nd              | 59              | nd               |
| rSA11/NSP1-R2A-UnaG      | 2156             | 678             | 496 + 182       | 79              | 59 + 20          |
| rSA11/NSP1-R2A(P/G)-UnaG | 21156            | 678             | nd              | 79              | nd               |

  

| Virus                     | Genome segment 7 |                 |                 |                 |                  |
|---------------------------|------------------|-----------------|-----------------|-----------------|------------------|
|                           | RNA size (bp)    | Protein Product |                 |                 |                  |
|                           |                  | uncleaved (aa)  | 2A cleaved (aa) | uncleaved (kDa) | 2A cleaved (kDa) |
| rSA11-wt                  | 1105             | 315             | nd              | 36              | nd               |
| rSA11/NSP3-R2A-UnaG       | 1651             | 497             | 334 + 163       | 57              | 39 + 18          |
| rSA11/NSP3-P2A-UnaG       | 1657             | 499             | 336 + 163       | 57              | 39 + 18          |
| rSA11/NSP3-P2A-mRuby      | 1951             | 597             | 336 + 261       | 68              | 39 + 29          |
| rSA11/NSP3-P2A-mKATE      | 1951             | 597             | 336 + 261       | 68              | 39 + 29          |
| rSA11/NSP3-P2A-BPB        | 1942             | 594             | 336 + 258       | 68              | 39 + 29          |
| rSA11/NSP3-mRuby-P2A-UnaG | 2437             | 759             | 596 + 163       | 86              | 68 + 18          |
